# Supplementary material
Source: Elsevier journal article supplement (https://discovery.ucl.ac.uk/1443272/4/mmc1.docx)
Supplement: mmc1 [file mmc1.docx]

**Supplement Brose et al, Changes in success rates of smoking cessation treatment associated with take up of a national evidence-based training programme**

Table S1. Face-to-face (skills) training courses. Analysis included courses up to December 2011 (course 26).

| **Course location** | **Date** |
| --- | --- |
| 1. Leeds (pilot) | 3 & 4 June 2010 |
| 1. Oldham (pilot) | 24 & 25 June 2010 |
| 1. Lewisham (pilot) | 1 & 2 July 2010 |
| 1. Camden (pilot) | 8 & 9 July 2010 |
| 1. Somerset | 5& 6 October 2010 |
| 1. Stoke-on-Trent | 18 & 19 October 2010 |
| 1. Sandwell | 18 & 19 November 2010 |
| 1. Telford | 17 & 18 January 2011 |
| 1. Staffordshire | 22 & 23 March 2011 |
| 1. Middlesbrough | 12 & 13 April 2011 |
| 1. Manchester | 16 & 17 May 2011 |
| 1. Bolton | 6 & 7 June 2011 |
| 1. Pimlico, London | 20 & 21 June 2011 |
| 1. Waterloo | 4 & 5 July 2011 |
| 1. Chester | 13 & 14 July 2011 |
| 1. Birmingham | 19 & 20 July 2011 |
| 1. Croydon | 26 & 27 July 2011 |
| 1. Liverpool | 3 & 4 August 2011 |
| 1. Brighouse | 6 & 7 September 2011 |
| 1. Brands Hatch / Dartford | 19 & 20 September 2011 |
| 1. Loughborough | 29 & 30 September 2011 |
| 1. Huntingdon | 13 & 14 October 2011 |
| 1. Coventry | 24 & 25 October 2011 |
| 1. Taunton | 2 & 3 November 2011 |
| 1. West Bromwich | 17 & 18 November 2011 |
| 1. Newmarket | 7 & 8 December 2011 |
| 1. London | 14 & 15 December 2011 |
| 1. Reading, SW & South Central | 10 & 11 January 2012 |
| 1. Durham | 19 & 20 January 2012 |
| 1. London | 6 & 7 February 2012 |
| 1. London | 27 & 28 February 2012 |
| 1. Manchester | 6 & 7 March 2012 |
| 1. Leeds | 19 & 20 March 2012 |
| 1. Blackburn | 2 & 3 April 2012 |
| 1. Lancaster | 12 & 13 April 2012 |
| 1. Doncaster | 24 & 25 April 2012 |
| 1. Newcastle | 1 & 2 May 2012 |
